# Supplementary material for: MoS2@C with S vacancies vertically anchored on V2C-MXene for efficient lithium and sodium storage
Source: Royal Society of Chemistry journal article supplement (doi:10.1039/d2qi02389j), 2023-01-01
Supplement: d2qi02389j1.pdf [file d2qi02389j1.pdf]

## MoS<sub>2</sub>@C with S vacancies vertically anchored on V<sub>2</sub>C-MXene for efficient lithium and sodium storage

Guilong Liu<sup>a</sup>, Ting Zhang<sup>a</sup>, Xiaojie Li<sup>a</sup>, Jin Li<sup>a</sup>, Naiteng Wu<sup>a</sup>, Ang Cao<sup>b</sup>, Weiwei Yuan<sup>a</sup>, Kunming Pan<sup>c,d</sup>, Donglei Guo<sup>\*a</sup> and Xianming Liu<sup>\*a</sup>

<sup>a</sup> Key Laboratory of Function-oriented Porous Materials of Henan Province, College of Chemistry and Chemical Engineering, Luoyang Normal University, Luoyang 471934, Henan, China

<sup>b</sup> Department of Physics, Technical University of Denmark, Lyngby 2800, Denmark

<sup>c</sup> Henan Key Laboratory of High-temperature Structural and Functional Materials, Henan University of Science and Technology, Luoyang 471023, Henan, China

<sup>d</sup> Longmen Laboratory, Luoyang 471023, Henan, China

\*Corresponding author: gdl0594@163.com (Donglei Guo); myclxm@163.com (Xianming Liu)

**The calculation process for the composition of MoS<sub>2</sub>@C:** according to **Figure 3i**, the weight loss of MoS<sub>2</sub>@C between 200-460 °C and below 200 °C were measured to be 28.7% and 5.0%, respectively. After removing water, the actual weight loss between 200-460 °C was 30.2%, which originated from the oxidation of MoS<sub>2</sub> into MoO<sub>3</sub> and the combustion of carbon. So,  $0.1 W_{\text{MoS}_2} + W_{\text{C}} = 30.2\%$ ;  $W_{\text{MoS}_2} + W_{\text{C}} = 100\%$ . Therefore,  $W_{\text{MoS}_2} = 77.5\%$ ,  $W_{\text{C}} = 22.5\%$ . When heated to 1000 °C, not all MoO<sub>3</sub> sublimated, and the remaining MoO<sub>3</sub> was 4.9% after removing water.

**The calculation process for the composition of f-V<sub>2</sub>C-MoS<sub>2</sub>@C:** according to **Figure 3i**, the weight loss of f-V<sub>2</sub>C-MoS<sub>2</sub>@C between 200-520 °C and below 200 °C were measured to be 28.5% and 8.8%, respectively. After removing water, the actual weight loss between 200-520 °C was 31.2 %, which originated from the oxidation of MoS<sub>2</sub> into MoO<sub>3</sub>, the combustion of carbon and the weight change of V<sub>2</sub>C-MXene. When heated to 1000 °C, 29.4% of the samples remained, which contained un-sublimated MoO<sub>3</sub> and remained VO<sub>x</sub>. So,  $0.1 W_{\text{MoS}_2} + W_{\text{C}} + 0.084 W_{\text{V}_2\text{C}} = 31.2\%$ ;  $(4.9/77.5) W_{\text{MoS}_2} + (1-0.084)$

$W_{V_2C} = 29.4\%$ ;  $W_{MoS_2} + W_C + W_{V_2C} = 100\%$  Therefore,  $W_{MoS_2} = 47.1\%$ ,  $W_C = 23.9\%$ ,  $W_{V_2C} = 29.0\%$ .

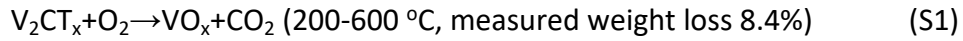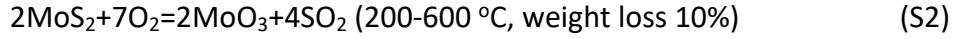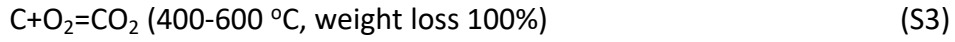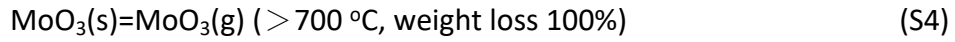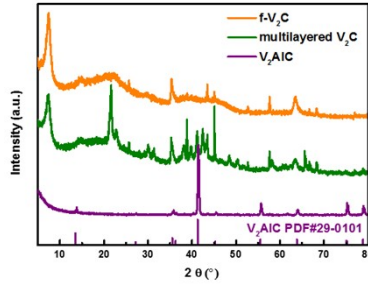

**Figure S1** XRD patterns of  $V_2AlC$ , multilayered  $V_2C$  and  $f-V_2C$

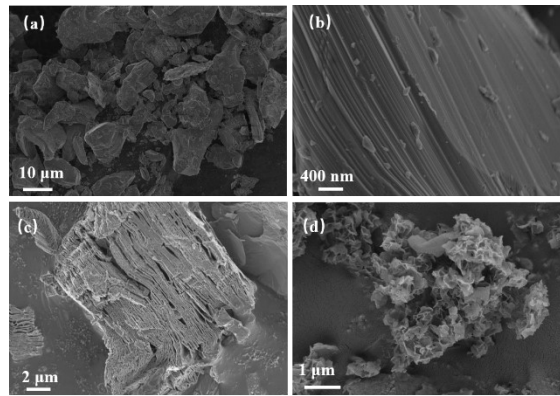

**Figure S2** SEM images of (a-b)  $V_2AlC$ , (c) multilayered  $V_2C$  and (d)  $f-V_2C$

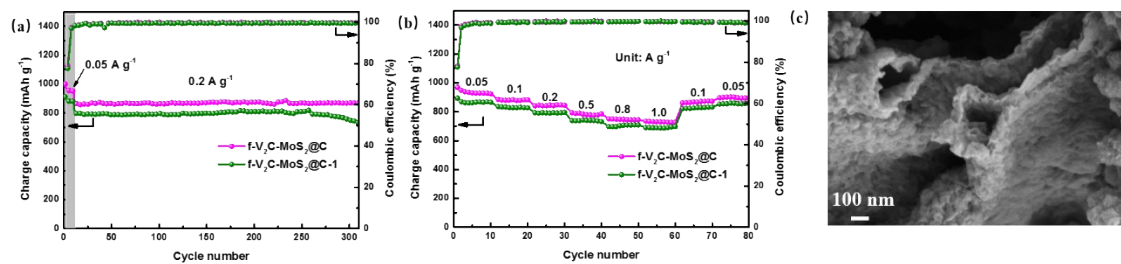

**Figure S3** (a) Cyclic and (b) rate performance of  $f-V_2C-MoS_2@C$  and  $f-V_2C-MoS_2@C-1$  in LIBs; (c) SEM image of  $f-V_2C-MoS_2@C-1$

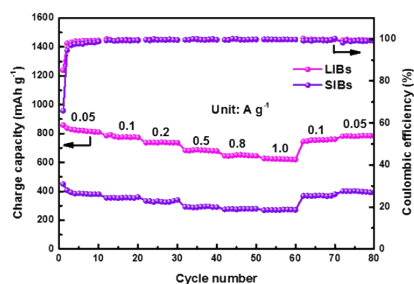

**Figure S4** Rate performance of f-V<sub>2</sub>C-MoS<sub>2</sub>@C with a mass loading of 3 mg cm<sup>-2</sup>

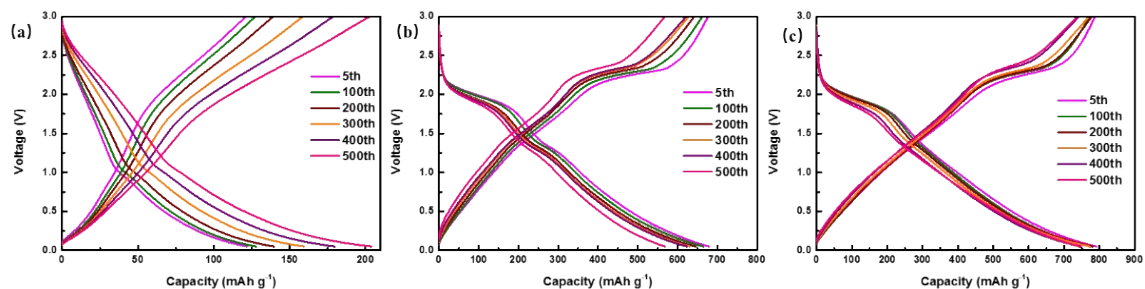

**Figure S5** GCD curves of (a) f-V<sub>2</sub>C, (b) MoS<sub>2</sub>@C and (c) f-V<sub>2</sub>C-MoS<sub>2</sub>@C in LIBs at 0.5 A g<sup>-1</sup>

g<sup>-1</sup>

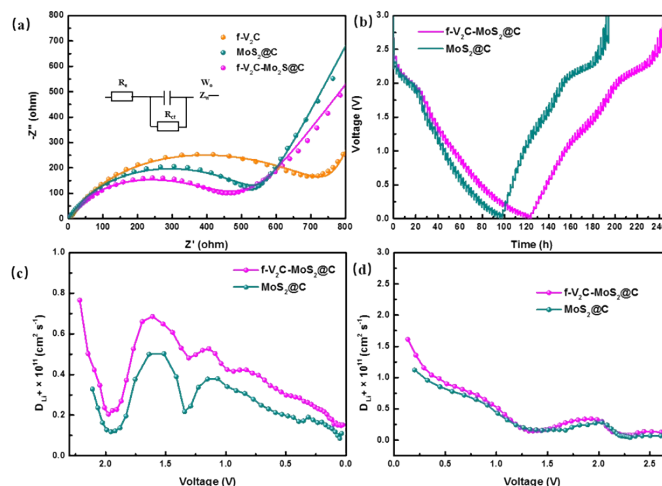

**Figure S6** (a) EIS spectra of the three fresh electrodes in LIBs; (b) GITT profiles and the calculated Li<sup>+</sup> diffusion coefficients during (c) discharge and (d) charge process for MoS<sub>2</sub>@C and f-V<sub>2</sub>C-MoS<sub>2</sub>@C in LIBs

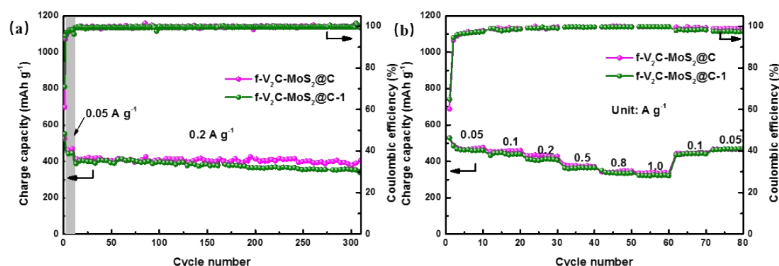

**Figure S7** (a) Cyclic and (b) rate performance of f-V<sub>2</sub>C-MoS<sub>2</sub>@C and f-V<sub>2</sub>C-MoS<sub>2</sub>@C-1

in SIBs

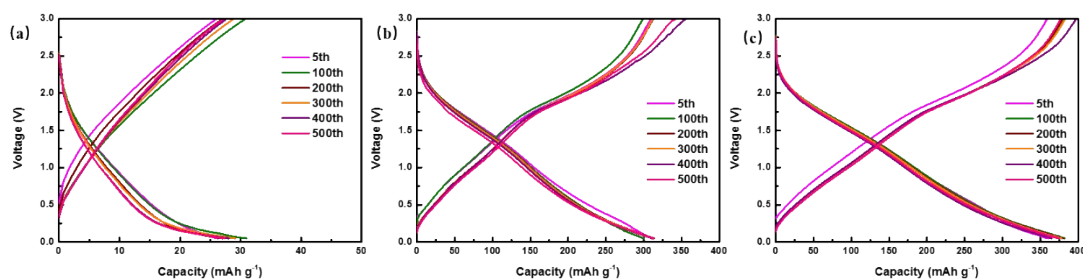

**Figure S8** GCD curves of (a) f-V<sub>2</sub>C, (b) MoS<sub>2</sub>@C and (c) f-V<sub>2</sub>C-MoS<sub>2</sub>@C in SIBs at 0.5 A g<sup>-1</sup>

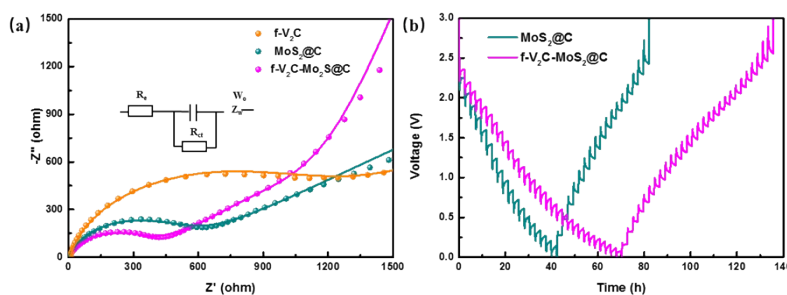

**Figure S9** (a) EIS spectra of the three fresh electrodes in SIBs; (b) GITT profiles for MoS<sub>2</sub>@C and f-V<sub>2</sub>C-MoS<sub>2</sub>@C in SIBs

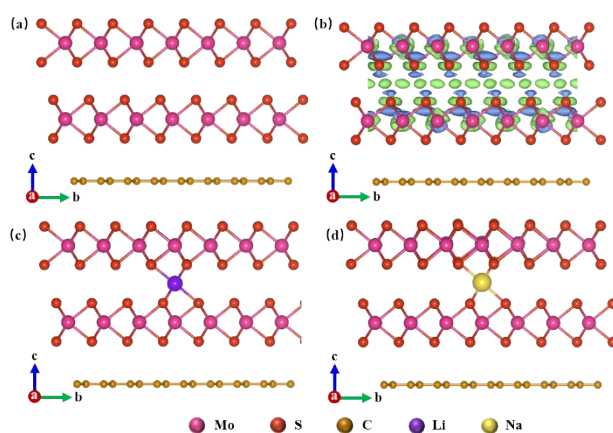

**Figure S10** (a) Optimized structure and (b) charge density difference (green and blue isosurfaces showed the accumulation and depletion of electrons region, respectively) of graphene/MoS<sub>2</sub> (001)/MoS<sub>2</sub> (001) model; optimized structures of graphene/ MoS<sub>2</sub> (001)/ MoS<sub>2</sub> (001) model with a (c) Li and (d) Na atom adsorbed

**Table S1** Electrochemical performance of state-of-the-art MoS<sub>2</sub>-based anode materials in LIBs and SIBs

| Materials                                                            | Battery system | Cyclic performance                                                                                                                               | Rate performance                                    | Reference        |
|----------------------------------------------------------------------|----------------|--------------------------------------------------------------------------------------------------------------------------------------------------|-----------------------------------------------------|------------------|
| <b>f-V<sub>2</sub>C-MoS<sub>2</sub>@C</b>                            |                | <b>0.73 Ah g<sup>-1</sup> after 500 cycles at 0.5 A g<sup>-1</sup></b><br><b>0.87Ah g<sup>-1</sup> after 300 cycles at 0.2 A g<sup>-1</sup></b>  | <b>0.73 Ah g<sup>-1</sup> at 1 A g<sup>-1</sup></b> | <b>This work</b> |
| WS <sub>2</sub> /MoS <sub>2</sub> @C                                 |                | 1.03 Ah g <sup>-1</sup> after 450 cycles at 0.5 A g <sup>-1</sup>                                                                                | 0.48 Ah g <sup>-1</sup> at 1 A g <sup>-1</sup>      | 1                |
| MoS <sub>2</sub> /C@G                                                |                | 0.67 Ah g <sup>-1</sup> after 1000 cycles at 0.5 A g <sup>-1</sup>                                                                               | 0.45 Ah g <sup>-1</sup> at 1 A g <sup>-1</sup>      | 2                |
| c-MoS <sub>2</sub>                                                   |                | 0.8 Ah g <sup>-1</sup> after 200 cycles at 0.2 A g <sup>-1</sup>                                                                                 | 0.58 Ah g <sup>-1</sup> at 1 A g <sup>-1</sup>      | 3                |
| MoS <sub>2</sub> @C-23                                               | LIBs           | 0.63 Ah g <sup>-1</sup> after 800 cycles at 1 A g <sup>-1</sup>                                                                                  | 0.93 Ah g <sup>-1</sup> at 1 A g <sup>-1</sup>      | 4                |
| MoS <sub>2</sub> -PVP@NC                                             |                | 0.61 Ah g <sup>-1</sup> after 300 cycles at 1 A g <sup>-1</sup>                                                                                  | 0.67 Ah g <sup>-1</sup> at 1 A g <sup>-1</sup>      | 5                |
| MoS <sub>2</sub> /SnS                                                |                | 0.99 Ah g <sup>-1</sup> after 200 cycles at 0.2 A g <sup>-1</sup>                                                                                | 0.89 Ah g <sup>-1</sup> at 1 A g <sup>-1</sup>      | 6                |
| Ti <sub>3</sub> C <sub>2</sub> /TiO <sub>2</sub> @f-MoS <sub>2</sub> |                | 0.49 Ah g <sup>-1</sup> after 100 cycles at 0.1 A g <sup>-1</sup>                                                                                | 0.23 Ah g <sup>-1</sup> at 1 A g <sup>-1</sup>      | 7                |
| CNTs@MoS <sub>2</sub> /MoO <sub>2</sub>                              |                | 0.58 Ah g <sup>-1</sup> after 200 cycles at 0.335 A g <sup>-1</sup>                                                                              | 0.45 Ah g <sup>-1</sup> at 0.67 A g <sup>-1</sup>   | 8                |
| TiO <sub>2</sub> @MoS <sub>2</sub> nanotubes                         |                | 0.62 Ah g <sup>-1</sup> after 100 cycles at 0.1 A g <sup>-1</sup>                                                                                | 0.43 Ah g <sup>-1</sup> at 1 A g <sup>-1</sup>      | 9                |
| <b>f-V<sub>2</sub>C-MoS<sub>2</sub>@C</b>                            |                | <b>0.40 Ah g<sup>-1</sup> after 300 cycles at 0.2 A g<sup>-1</sup></b><br><b>0.37 Ah g<sup>-1</sup> after 500 cycles at 0.5 A g<sup>-1</sup></b> | <b>0.34 Ah g<sup>-1</sup> at 1 A g<sup>-1</sup></b> | <b>This work</b> |
| WS <sub>2</sub> /MoS <sub>2</sub> @C                                 | SIBs           | 0.37 Ah g <sup>-1</sup> after 280 cycles at 1 A g <sup>-1</sup>                                                                                  | 0.36 Ah g <sup>-1</sup> at 1 A g <sup>-1</sup>      | 1                |
| c-MoS <sub>2</sub>                                                   |                | ~0.32 Ah g <sup>-1</sup> after 100 cycles at 0.2 A g <sup>-1</sup>                                                                               | 0.28 Ah g <sup>-1</sup> at 1 A g <sup>-1</sup>      | 3                |

---

|                                                         |                                                                   |                                                  |    |
|---------------------------------------------------------|-------------------------------------------------------------------|--------------------------------------------------|----|
| MoS <sub>2</sub> @C-23                                  | 0.33 Ah g <sup>-1</sup> after 100 cycles at 0.2 A g <sup>-1</sup> | 0.29 Ah g <sup>-1</sup> at 1 A g <sup>-1</sup>   | 4  |
| MoS <sub>2</sub> -PVP@NC                                | 0.41 Ah g <sup>-1</sup> after 200 cycles at 1 A g <sup>-1</sup>   | 0.38 Ah g <sup>-1</sup> at 1 A g <sup>-1</sup>   | 5  |
| P-MoS <sub>2</sub> @C/CNTP                              | 0.25 Ah g <sup>-1</sup> after 1000 cycles at 1 A g <sup>-1</sup>  | 0.31 Ah g <sup>-1</sup> at 1 A g <sup>-1</sup>   | 10 |
| MX-H-MoS <sub>2</sub> @NC                               | 0.26 Ah g <sup>-1</sup> after 1100 cycles at 1 A g <sup>-1</sup>  | ~0.34 Ah g <sup>-1</sup> at 1 A g <sup>-1</sup>  | 11 |
| MoS <sub>2</sub> @C                                     | 0.40 Ah g <sup>-1</sup> after 100 cycles at 0.1 A g <sup>-1</sup> | 0.19 Ah g <sup>-1</sup> at 0.8 A g <sup>-1</sup> | 12 |
| 20Nb <sub>2</sub> CT <sub>x</sub> /MoS <sub>2</sub> @CS | 0.39 Ah g <sup>-1</sup> after 800 cycles at 1 A g <sup>-1</sup>   | 0.38 Ah g <sup>-1</sup> at 1 A g <sup>-1</sup>   | 13 |
| Dual-phase MoS <sub>2</sub>                             | 0.30 Ah g <sup>-1</sup> after 200 cycles at 0.5 A g <sup>-1</sup> | 0.26 Ah g <sup>-1</sup> at 1 A g <sup>-1</sup>   | 14 |
| HMF-MoS <sub>2</sub>                                    | 0.38 Ah g <sup>-1</sup> after 100 cycles at 0.1 A g <sup>-1</sup> | 0.36 Ah g <sup>-1</sup> at 1 A g <sup>-1</sup>   | 15 |
| (MoS <sub>2</sub> /CF)@MoS <sub>2</sub> @C              | 0.33 Ah g <sup>-1</sup> after 1000 cycles at 1 A g <sup>-1</sup>  | 0.33 Ah g <sup>-1</sup> at 1 A g <sup>-1</sup>   | 16 |

---

**Table S2** Impedance parameters of the electrodes after 300 cycles in LIBs

| Materials                              | Fresh electrode |                 | Cycled electrode |                 |                 |
|----------------------------------------|-----------------|-----------------|------------------|-----------------|-----------------|
|                                        | $R_e/\Omega$    | $R_{ct}/\Omega$ | $R_e/\Omega$     | $R_{sf}/\Omega$ | $R_{ct}/\Omega$ |
| V <sub>2</sub> C                       | 4.4             | 698.4           | 1.7              | 91.6            | 58.8            |
| MoS <sub>2</sub> @C                    | 2.7             | 547.5           | 6.4              | 26.0            | 27.2            |
| f-V <sub>2</sub> C-MoS <sub>2</sub> @C | 2.2             | 395.4           | 2.3              | 6.8             | 7.1             |

**Table S3** Impedance parameters of the electrodes after 300 cycles in SIBs

| Materials                              | Fresh electrode |                 | Cycled electrode |                 |                 |
|----------------------------------------|-----------------|-----------------|------------------|-----------------|-----------------|
|                                        | $R_e/\Omega$    | $R_{ct}/\Omega$ | $R_e/\Omega$     | $R_{sf}/\Omega$ | $R_{ct}/\Omega$ |
| V <sub>2</sub> C                       | 6.8             | 1005            | 4.8              | 886.7           | 903.8           |
| MoS <sub>2</sub> @C                    | 1.8             | 489.9           | 0.7              | 63.2            | 671.9           |
| f-V <sub>2</sub> C-MoS <sub>2</sub> @C | 2.4             | 358.3           | 0.2              | 31.7            | 255.1           |

## References

1. Y. Rao, J. Wang, P. Liang, H. Zheng, M. Wu, J. Chen, F. Shi, K. Yan, J. Liu, K. Bian, C. Zhang and K. Zhu, Heterostructured WS<sub>2</sub>/MoS<sub>2</sub>@carbon hollow microspheres anchored on graphene for high-performance Li/Na storage, *Chem. Eng. J.*, 2022, **443**, 136080.
2. B. Lan, X. Zhang, Y. Wang, C. Wei and G. Wen, Constructing highly stable lithium storage materials by improving the bond strength of MoS<sub>2</sub> to graphene via chitosan, *Carbon*, 2022, **192**, 384-394.
3. J. Lin, Y.-H. Shi, Y.-F. Li, X.-L. Wu, J.-P. Zhang, H.-M. Xie and H.-Z. Sun, Confined MoS<sub>2</sub> growth in a unique composite matrix for ultra-stable and high-rate lithium/sodium-ion anodes, *Chem. Eng. J.*, 2022, **428**, 131103.
4. B. Ye, L. Xu, W. Wu, Y. Ye, Z. Yang, J. Ai, Y. Qiu, Z. Gong, Y. Zhou, Q. Huang, Z. Shen, F. Li, T. Guo and S. Xu, Encapsulation of 2D MoS<sub>2</sub> nanosheets into 1D carbon nanobelts as anodes with enhanced lithium/sodium storage properties, *J. Mater. Chem. C*, 2022, **10**, 3329-3342.

5. J. Bai, B. Zhao, X. Wang, H. Ma, K. Li, Z. Fang, H. Li, J. Dai, X. Zhu and Y. Sun, Yarn ball-like MoS<sub>2</sub> nanospheres coated by nitrogen-doped carbon for enhanced lithium and sodium storage performance, *J. Power Sources*, 2020, **465**, 228282.
6. J. Ru, T. He, B. Chen, Y. Feng, L. Zu, Z. Wang, Q. Zhang, T. Hao, R. Meng, R. Che, C. Zhang and J. Yang, Covalent Assembly of MoS<sub>2</sub> Nanosheets with SnS Nanodots as Linkages for Lithium/Sodium-Ion Batteries, *Angew. Chem. Int. Ed.*, 2020, **59**, 14621-14627.
7. X. Zhang, J. Li, L. Han, H. Li, J. Wang, T. Lu and L. Pan, In-situ fabrication of few-layered MoS<sub>2</sub> wrapped on TiO<sub>2</sub>-decorated MXene as anode material for durable lithium-ion storage, *J. Colloid Interface Sci.*, 2021, **604**, 30-38.
8. H. Lu, K. Tian, L. Bu, X. Huang, X. Li, Y. Zhao, F. Wang, J. Bai, L. Gao and J. Zhao, Synergistic effect from coaxially integrated CNTs@MoS<sub>2</sub>/MoO<sub>2</sub> composite enables fast and stable lithium storage, *J. Energy Chem.*, 2021, **55**, 449-458.
9. J. Li, L. Han, X. Zhang, H. Sun, X. Liu, T. Lu, Y. Yao and L. Pan, Multi-role TiO<sub>2</sub> layer coated carbon@few-layered MoS<sub>2</sub> nanotubes for durable lithium storage, *Chem. Eng. J.*, 2021, **406**, 126873.
10. S. Sui, H. Xie, M. Liang, B. Chen, C. Liu, E. Liu, B. Chen, L. Ma, J. Sha and N. Zhao, "Three-in-One" Multi-Level Design of MoS<sub>2</sub>-Based Anodes for Enhanced Sodium Storage: from Atomic to Macroscopic Level, *Adv. Funct. Mater.*, 2022, **32**, 2110853.
11. Y. Wu, W. Zhong, Q. Yang, C. Hao, Q. Li, M. Xu and S.-j. Bao, Flexible MXene-Ti<sub>3</sub>C<sub>2</sub>T<sub>x</sub> bond few-layers transition metal dichalcogenides MoS<sub>2</sub>/C spheres for fast and stable sodium storage, *Chem. Eng. J.*, 2022, **427**, 130960.
12. Z. Dong, X. Wu, D.-K. Cai, Q. Mao, K.-J. Huang, L. Wang and J. Xu, Interlayer-expanded MoS<sub>2</sub>@C hollow nanorods for enhanced sodium storage, *Chem. Eng. Sci.*, 2022, **262**, 117976.
13. Z. Yuan, J. Cao, S. Valerii, H. Xu, L. Wang and W. Han, MXene-Bonded hollow MoS<sub>2</sub>/Carbon sphere strategy for high-performance flexible sodium ion storage, *Chem. Eng. J.*, 2022, **430**, 132755.
14. J. Wu, J. Liu, J. Cui, S. Yao, M. Ihsan-UI-Haq, N. Mubarak, E. Quattrocchi, F.



Ciucci and J.-K. Kim, Dual-phase MoS<sub>2</sub> as a high-performance sodium-ion battery anode, *J. Mater. Chem. A*, 2020, **8**, 2114-2122.

15. Y. Li, R. Zhang, W. Zhou, X. Wu, H. Zhang and J. Zhang, Hierarchical MoS<sub>2</sub> Hollow Architectures with Abundant Mo Vacancies for Efficient Sodium Storage, *ACS Nano*, 2019, **13**, 5533-5540.
16. C. Cui, Z. Wei, J. Xu, Y. Zhang, S. Liu, H. Liu, M. Mao, S. Wang, J. Ma and S. Dou, Three-dimensional carbon frameworks enabling MoS<sub>2</sub> as anode for dual ion batteries with superior sodium storage properties, *Energy Storage Mater.*, 2018, **15**, 22-30.
